# Supplementary material for: Complexation induced fluorescence and acid–base properties of dapoxyl dye with γ-cyclodextrin: a drug-binding application using displacement assays
Source: Royal Society of Chemistry journal article supplement (doi:10.1039/c5cp01696g), 2015-01-01
Supplement: c5cp01696g1.pdf [file c5cp01696g1.pdf]

## SUPPORTING INFORMATION

### Complexation-Induced Fluorescence and Acid-Base Properties of Dapoxyl Dye with $\gamma$ -cyclodextrin: A Drug-Binding Application using Displacement Assay

Kaushik Pal,<sup>‡</sup> Suman Mallick<sup>‡</sup> and Apurba L. Koner \*

<sup>a</sup> Department of Chemistry, Indian Institute of Science Education and Research Bhopal, Bhopal, India. E-mail: akoner@iiserb.ac.in; Fax: +91-755 6692 392; Tel: +91-755 6692 376

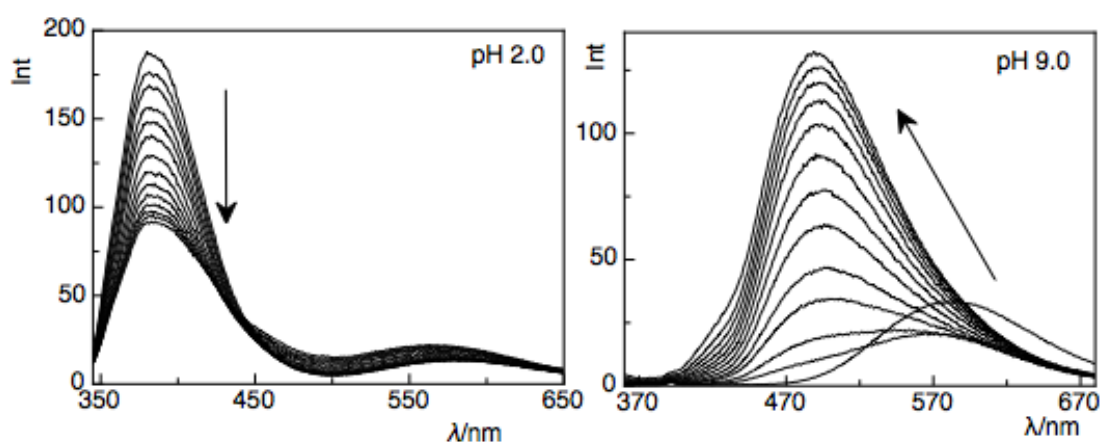

**Figure S1:** Fluorescence enhancement of dapoxyl dye ( $4\mu\text{M}$ ) upon successive addition of  $\gamma$ -CD up to 35mM at pH 2.0 (left) and pH 9.0 (right)

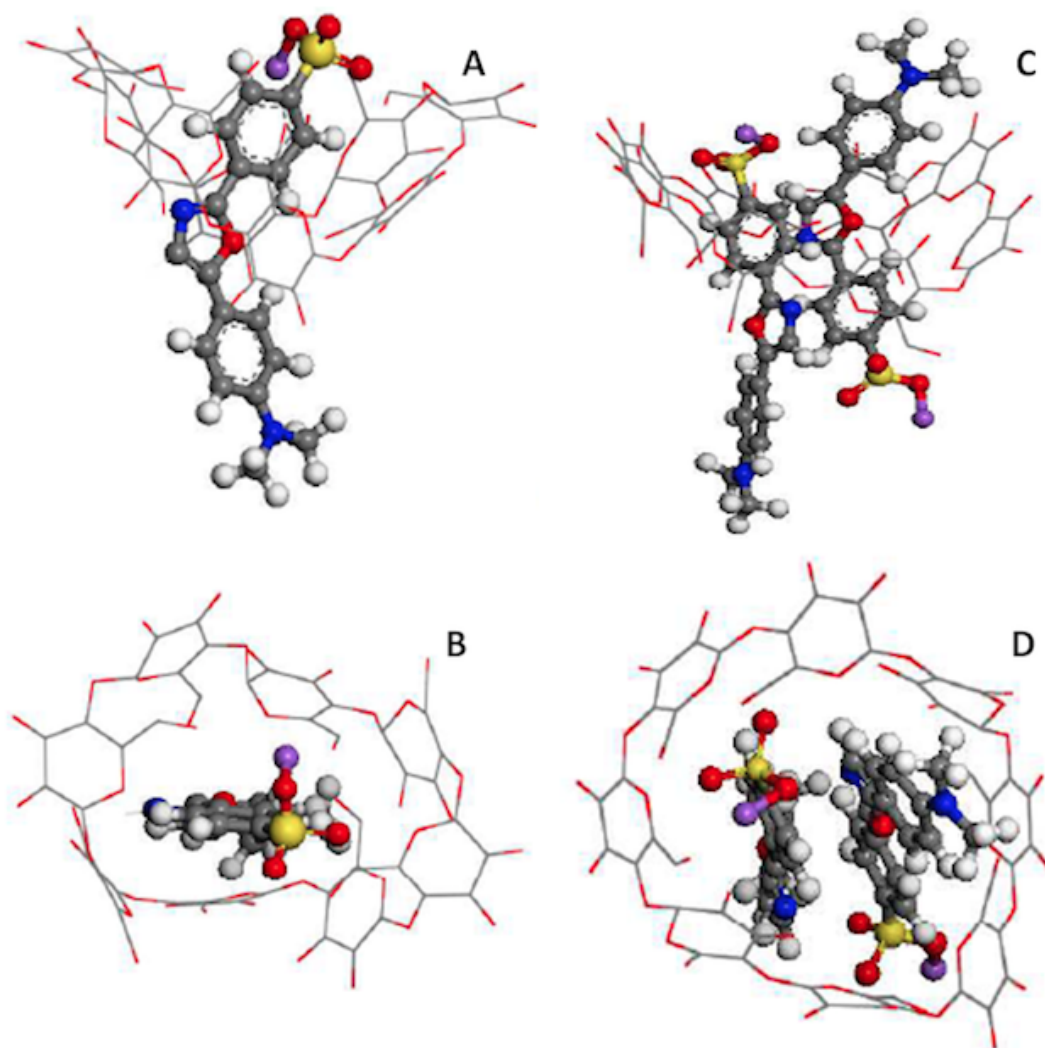

**Figure S2:** Energy optimized structure of DSS and  $\gamma$ -CD (a) side view, (b) top view of 1:1 complex, (c) side view and (d) top view of 1:2 complex.

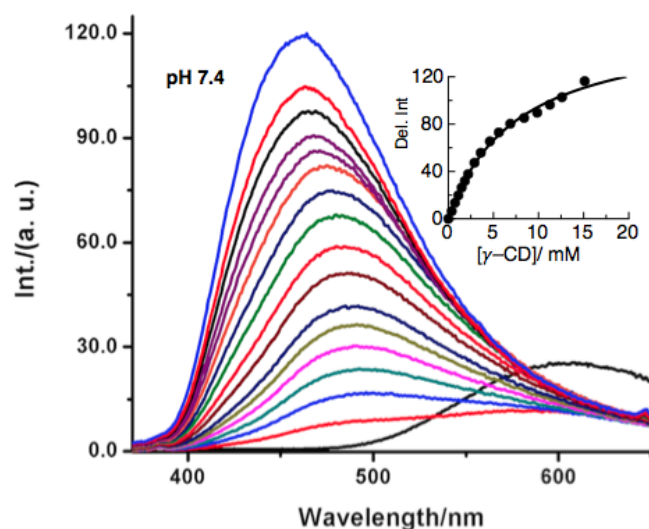

**Figure S3:** Fluorescence titration of DSS with  $\gamma$ -CD in phosphate buffer solution (100 mM) at pH 7.4 shows blue shift in the emission maxima with gradual increase in the fluorescence intensity, inset shows data fitted with 1:2 binding model having  $K_1K_2=2700 \pm 300$   $M^{-2}$ .

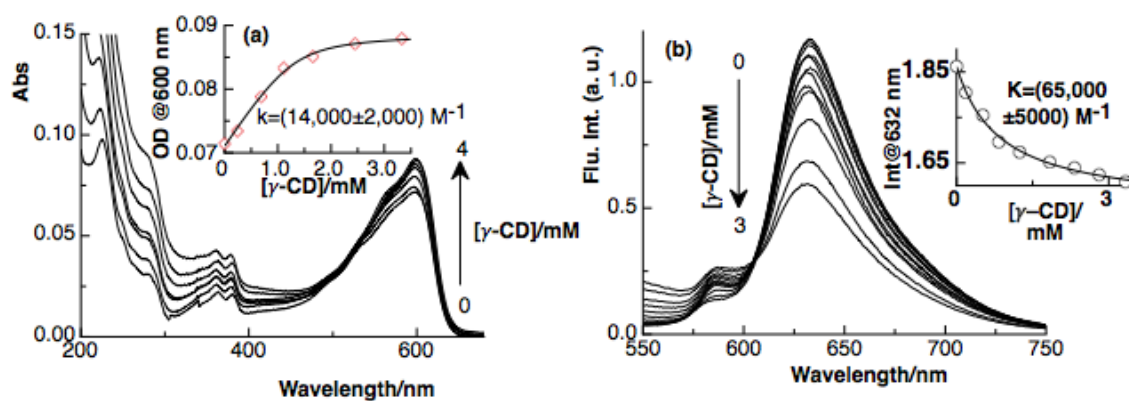

**Figure S4.** Binding titration plot and binding constant of Resazurin with  $\gamma$ -CD at pH 7.4 using (a) UV and (b) fluorescence spectroscopy. Titrations are performed with  $5\mu M$  Resazurin and gradual increase of  $\gamma$ -CD concentration; data was fitted with 1:1 binding equation.

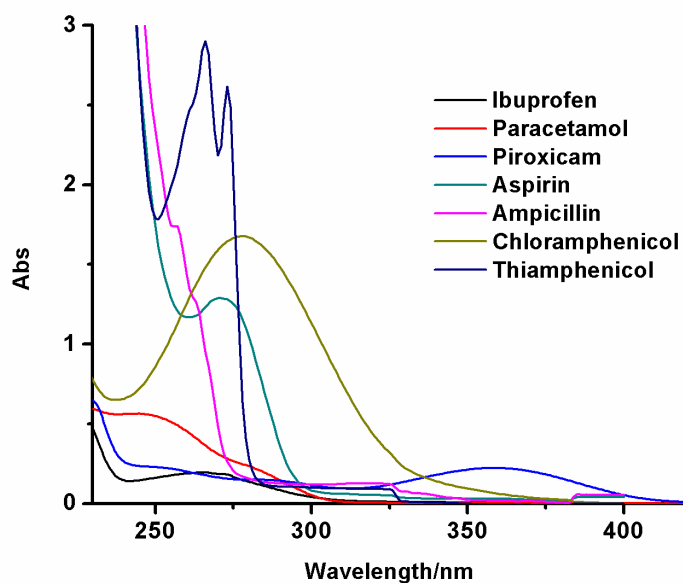

**Figure S5.** UV-Vis of studied drugs in water at pH 7.4

**Hydrodynamic volume calculation of  $\gamma$ -CD DSS complex:**

Hydrodynamic diameter of  $\gamma$ -CD = 17.5 Å<sup>[1]</sup>, Hydrodynamic volume of the  $\gamma$ -CD = 2800 Å<sup>3</sup>, Molar Hydrodynamic volume of  $\gamma$ -CD ~1690 cm<sup>3</sup> mol<sup>-1</sup>

Molar Hydrodynamic volume of phenyl group  $\approx$  43.4 cm<sup>3</sup> mol<sup>-1</sup>[2]

Molar Hydrodynamic volume of isopropyl group  $\approx$  30.7 cm<sup>3</sup> mol<sup>-1</sup>[2] and as *N, N*-dimethylamino group is similar to isopropyl group we assume the same volume for *N, N*-dimethylamino group for our calculation.

So molar hydrodynamic volume of *N, N*-dimethylanilino group  $\approx$  (43.4+ 30.7) cm<sup>3</sup> mol<sup>-1</sup>  $\approx$  74.1 cm<sup>3</sup> mol<sup>-1</sup>

As it is a 1:2 complex and the dimethylanilino group projecting both the side, then total molar hydrodynamic volume of the complex  $\approx$  {volume of  $\gamma$ -CD+ (*N, N*-dimethylanilino group x2)}  $\approx$  {1690+ (74.1x2)} cm<sup>3</sup> mol<sup>-1</sup>  $\approx$  1838.2 cm<sup>3</sup> mol<sup>-1</sup>

**References:**

- [1] J. Szejtli, *Chem. Rev.* **1998**, 98, 1743-1754.
- [2] H. Bakirci, A. L. Koner, W. M. Nau, *J. Org. Chem.* **2005**, 70, 9960-9966.
